# Supplementary material
Source: ML conference proceedings conference paper supplement (https://proceedings.neurips.cc/paper_files/paper/2020/hash/c4c28b367e14df88993ad475dedf6b77-Abstract.html)
Supplement: Supplementary file [file c4c28b367e14df88993ad475dedf6b77-Supplemental.pdf]

---

# Bayes Consistency vs. $\mathcal{H}$ -Consistency: The Interplay between Surrogate Loss Functions and the Scoring Function Class

---

## Appendix

### A Proof of Lemma 1

*Proof.* This essentially follows from the definition of  $\mathcal{F}_{\text{spwlin}}$ . In particular, we have:

$$\begin{aligned}
f_y(\mathbf{x}) \geq 0 &\iff \min_{y' \neq y} \{(\mathbf{w}_y - \mathbf{w}_{y'})^\top \mathbf{x} + (b_y - b_{y'})\} \geq 0 \\
&\iff \min_{y' \neq y} \{(\mathbf{w}_y^\top \mathbf{x} + b_y) - (\mathbf{w}_{y'}^\top \mathbf{x} + b_{y'})\} \geq 0 \\
&\iff (\mathbf{w}_y^\top \mathbf{x} + b_y) \geq (\mathbf{w}_{y'}^\top \mathbf{x} + b_{y'}) \quad \forall y' \neq y \\
&\iff y \in \operatorname{argmax}_{y' \in [n]} \mathbf{w}_{y'}^\top \mathbf{x} + b_{y'}.
\end{aligned}$$

□

### B Proof of Theorem 2

*Proof.* Let  $D$  be a  $\mathcal{H}_{\text{lin}}$ -realizable distribution. Then  $\exists h^* \in \mathcal{H}_{\text{lin}}$  such that  $\mathbf{P}_{(X,Y) \sim D}(Y = h^*(X)) = 1$ , and therefore  $\operatorname{er}_D^{0-1}[\mathcal{H}_{\text{lin}}] = 0$ . Thus our goal is to show that  $\exists$  a strictly increasing function  $g: \mathbb{R}_+ \rightarrow \mathbb{R}_+$  that is continuous at 0 with  $g(0) = 0$  such that for all  $\mathbf{f} \in \mathcal{F}_{\text{spwlin}}$ ,

$$\operatorname{er}_D^{0-1}[\operatorname{argmax} \circ \mathbf{f}] \leq g\left(\operatorname{er}_D^{\text{OvA}, \log}[\mathbf{f}] - \operatorname{er}_D^{\text{OvA}, \log}[\mathcal{F}_{\text{spwlin}}]\right).$$

We will do this in two parts:

(1) We will show that  $\operatorname{er}_D^{\text{OvA}, \log}[\mathcal{F}_{\text{spwlin}}] = 0$ .

(2) We will show that for all  $\mathbf{f} \in \mathcal{F}_{\text{spwlin}}$ ,  $\operatorname{er}_D^{0-1}[\operatorname{argmax} \circ \mathbf{f}] \leq \frac{1}{\ln(2)} \operatorname{er}_D^{\text{OvA}, \log}[\mathbf{f}]$ .

Putting these together will then give that for all  $\mathbf{f} \in \mathcal{F}_{\text{spwlin}}$ ,

$$\operatorname{er}_D^{0-1}[\operatorname{argmax} \circ \mathbf{f}] \leq \frac{1}{\ln(2)} \left(\operatorname{er}_D^{\text{OvA}, \log}[\mathbf{f}] - \operatorname{er}_D^{\text{OvA}, \log}[\mathcal{F}_{\text{spwlin}}]\right).$$

**Part 1.** We will show that for any sufficiently small  $\epsilon > 0$ ,  $\exists \mathbf{f}^\epsilon \in \mathcal{F}_{\text{spwlin}}$  such that  $\operatorname{er}_D^{\text{OvA}, \log}[\mathbf{f}^\epsilon] < \epsilon$ ; this will establish that  $\operatorname{er}_D^{\text{OvA}, \log}[\mathcal{F}_{\text{spwlin}}] = 0$ .

Let  $0 < \epsilon < 2n \ln(2)$ . Since  $h^* \in \mathcal{H}_{\text{lin}}$ , we have  $\exists \{\mathbf{w}_y^*, b_y^*\}_{y=1}^n$  such that

$$h^*(\mathbf{x}) \in \operatorname{argmax}_{y \in [n]} (\mathbf{w}_y^*)^\top \mathbf{x} + b_y^* \quad \forall \mathbf{x}.$$

Define  $\mathbf{f}^* \in \mathcal{F}_{\text{spwlin}}$  as

$$\begin{aligned}
f_y^*(\mathbf{x}) &= \min_{y' \neq y} \{(\mathbf{w}_y^* - \mathbf{w}_{y'}^*)^\top \mathbf{x} + (b_y^* - b_{y'}^*)\} \\
&= \min_{y' \neq y} \{((\mathbf{w}_y^*)^\top \mathbf{x} + b_y^*) - ((\mathbf{w}_{y'}^*)^\top \mathbf{x} + b_{y'}^*)\}.
\end{aligned}$$

Then we have

$$\mathbf{P}_{(X,Y) \sim D}(f_Y^*(X) > 0) = 1.$$

Therefore  $\exists \kappa > 0$  such that

$$\mathbf{P}_{(X,Y) \sim D}(f_Y^*(X) < \kappa) \leq \frac{\epsilon}{2n \ln(2)}.$$

Define  $\mathbf{f}^\epsilon \in \mathcal{F}_{\text{spwlin}}$  as

$$f_y^\epsilon(\mathbf{x}) = \frac{f_y^*(\mathbf{x})}{\kappa} \ln \left( \frac{1}{e^{\epsilon/2n} - 1} \right).$$

Then it can be verified that

$$f_y^*(\mathbf{x}) > 0 \implies f_y^\epsilon(\mathbf{x}) > 0 \implies \psi_{\text{OvA}, \log}(y, \mathbf{f}^\epsilon(\mathbf{x})) \leq n \ln(2),$$

and moreover,

$$f_y^*(\mathbf{x}) \geq \kappa \implies f_y^\epsilon(\mathbf{x}) \geq \ln \left( \frac{1}{e^{\epsilon/2n} - 1} \right) \implies \psi_{\text{OvA}, \log}(y, \mathbf{f}^\epsilon(\mathbf{x})) \leq \frac{\epsilon}{2}.$$

This gives

$$\begin{aligned} \text{er}_D^{\text{OvA}, \log}[\mathbf{f}^\epsilon] &= \mathbf{E}_{(X,Y) \sim D} [\psi_{\text{OvA}, \log}(Y, \mathbf{f}^\epsilon(X))] \\ &\leq \mathbf{P}_{(X,Y) \sim D}(0 < f_Y^*(X) < \kappa) \cdot \mathbf{E}[\psi_{\text{OvA}, \log}(Y, \mathbf{f}^\epsilon(X)) \mid 0 < f_Y^*(X) < \kappa] \\ &\quad + \mathbf{P}_{(X,Y) \sim D}(f_Y^*(X) \geq \kappa) \cdot \mathbf{E}[\psi_{\text{OvA}, \log}(Y, \mathbf{f}^\epsilon(X)) \mid f_Y^*(X) \geq \kappa] \\ &\leq \frac{\epsilon}{2n \ln(2)} \cdot n \ln(2) + 1 \cdot \frac{\epsilon}{2} \\ &= \epsilon. \end{aligned}$$

**Part 2.** Let  $\mathbf{f} \in \mathcal{F}_{\text{spwlin}}$ , and let  $\{\mathbf{w}_y, b_y\}_{y=1}^n$  be such that

$$f_y(\mathbf{x}) = \min_{y' \neq y} \{(\mathbf{w}_y - \mathbf{w}_{y'})^\top \mathbf{x} + (b_y - b_{y'})\} \quad \forall \mathbf{x}.$$

Define  $h : \mathcal{X} \rightarrow \mathcal{Y}$  such that

$$h(\mathbf{x}) \in \operatorname{argmax}_{y \in [n]} f_y(\mathbf{x}) \quad \forall \mathbf{x}.$$

Then we have

$$\begin{aligned} \text{er}_D^{0,1}[h] &= \mathbf{E}_{(X,Y) \sim D} [\ell_{0,1}(Y, h(X))] \\ &= \mathbf{E}_{(X,Y) \sim D} [\mathbf{1}(h(X) \neq Y)] \\ &= \mathbf{E}_{(X,Y) \sim D} \left[ \sum_{y \neq Y} \mathbf{1}(h(X) = y) \right] \\ &\leq \mathbf{E}_{(X,Y) \sim D} \left[ \sum_{y \neq Y} \mathbf{1}(f_y(X) \geq 0) \right] \quad (\text{by definition of } h \text{ and Lemma 1}) \\ &\leq \frac{1}{\ln(2)} \mathbf{E}_{(X,Y) \sim D} \left[ \sum_{y \neq Y} \ln(1 + e^{f_y(X)}) \right] \\ &\leq \frac{1}{\ln(2)} \mathbf{E}_{(X,Y) \sim D} \left[ \ln(1 + e^{-f_Y(X)}) + \sum_{y \neq Y} \ln(1 + e^{f_y(X)}) \right] \\ &\hspace{15em} (\text{since } \ln(1 + e^{-f_y(\mathbf{x})}) \geq 0 \quad \forall (\mathbf{x}, y)) \\ &= \frac{1}{\ln(2)} \mathbf{E}_{(X,Y) \sim D} [\ell_{\text{OvA}, \log}(Y, \mathbf{f}(X))] \\ &= \frac{1}{\ln(2)} \text{er}_D^{\text{OvA}, \log}[\mathbf{f}]. \end{aligned}$$

□

### C Proof of Theorem 3

*Proof.* Let  $\mathbf{w}_1, \dots, \mathbf{w}_n \in \mathbb{R}^d, b_1, \dots, b_n \in \mathbb{R}$ , and let  $\mathbf{f} \in \mathcal{F}_{\text{spwlin}}$  be parametrized by  $\{\mathbf{w}_y, b_y\}_{y=1}^n$ , so that

$$f_y(\mathbf{x}) = \min_{y' \neq y} \{(\mathbf{w}_y - \mathbf{w}_{y'})^\top \mathbf{x} + (b_y - b_{y'})\} \quad \forall \mathbf{x}.$$

We will show that

$$\operatorname{argmax}_{y \in [n]} f_y(\mathbf{x}) = \operatorname{argmax}_{y \in [n]} \mathbf{w}_y^\top \mathbf{x} + b_y ;$$

this will establish the result.

To see that the above claim is true, notice that we can write

$$f_y(\mathbf{x}) = (\mathbf{w}_y^\top \mathbf{x} + b_y) - \max_{y' \neq y} \{ \mathbf{w}_{y'}^\top \mathbf{x} + b_{y'} \} .$$

In other words,  $f_y(\mathbf{x})$  is the difference between  $(\mathbf{w}_y^\top \mathbf{x} + b_y)$  and the largest value of  $(\mathbf{w}_{y'}^\top \mathbf{x} + b_{y'})$  among  $y' \neq y$ . Clearly, this difference is largest when  $(\mathbf{w}_y^\top \mathbf{x} + b_y) \geq (\mathbf{w}_{y'}^\top \mathbf{x} + b_{y'}) \forall y' \neq y$  (in particular, in this case the difference is non-negative; in all other cases, the difference is negative, and therefore smaller). Thus

$$f_y(\mathbf{x}) \geq f_{y'}(\mathbf{x}) \forall y' \neq y \iff (\mathbf{w}_y^\top \mathbf{x} + b_y) \geq (\mathbf{w}_{y'}^\top \mathbf{x} + b_{y'}) \forall y' \neq y .$$

This proves the claim. □

## D Proof of Corollary 4

This follows directly from the proof of Theorem 3.

## E Details of Real Data Sets Used in Experiments in Section 5.2

Table 3: Multiclass classification data sets used in experiments in Section 5.2.

| Data set         | # train | # validation | # test | # classes<br>( $n$ ) | # features<br>( $d$ ) |
|------------------|---------|--------------|--------|----------------------|-----------------------|
| Coverttype (50K) | 30000   | 10000        | 10000  | 7                    | 54                    |
| Digits           | 5620    | 1874         | 3498   | 10                   | 16                    |
| USPS             | 5468    | 1823         | 2007   | 10                   | 256                   |
| MNIST (70K)      | 45000   | 15000        | 10000  | 10                   | 780                   |
| CIFAR10          | 37500   | 12500        | 10000  | 10                   | 3072                  |
| Sensorless       | 35105   | 11702        | 11702  | 11                   | 48                    |
| Letter           | 10500   | 4500         | 5000   | 26                   | 16                    |

### Notes:

**Subsampling:** For Coverttype, we used a random subsample of the original data set containing 50,000 examples (the original data set has 581,012 examples).

**Image data sets with pixel features:** The versions of the USPS and MNIST datasets that we used came with features scaled to the ranges  $[-1, 1]$  and  $[0, 1]$ , respectively. For CIFAR10, we similarly scaled the features to the range  $[0, 1]$  by dividing all features by 255.
